# Supplementary material for: Bidirectional transport of 2-chloroadenosine by equilibrative nucleoside transporter 4 (hENT4): Evidence for allosteric kinetics at acidic pH
Source: PubMed Central journal article supplement (PMC6753126; doi:10.1038/s41598-019-49929-w), 2019-09-19

**Bidirectional transport of 2-chloroadenosine by equilibrative nucleoside transporter 4 (hENT4):**

**Evidence for allosteric kinetics at acidic pH**

David Tandio, Gonzalo Vilas, James R Hammond

Department of Pharmacology, University of Alberta, Edmonton, Alberta, Canada

SUPPLEMENTAL DATA

Supplemental Figure 1: Full size gels from which the cropped images shown in Figure 1 were derived. Unlabelled lanes were samples run on the same gels but from other sources not relevant to the study described in this paper.

**A. PCR**

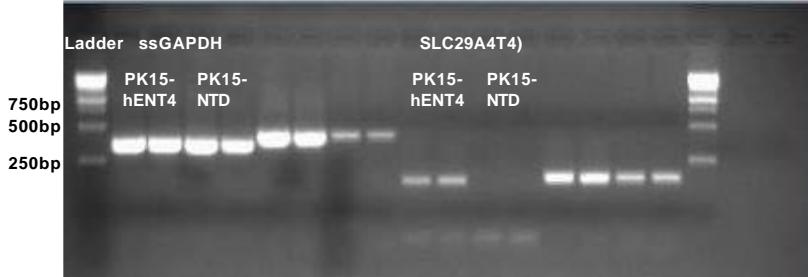

**B. Myc Immunoblot**

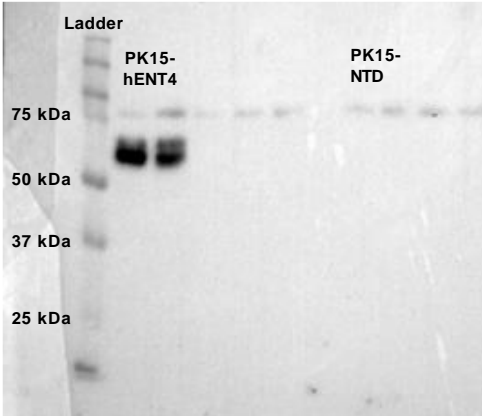

**C. GAPDH Immunoblot**

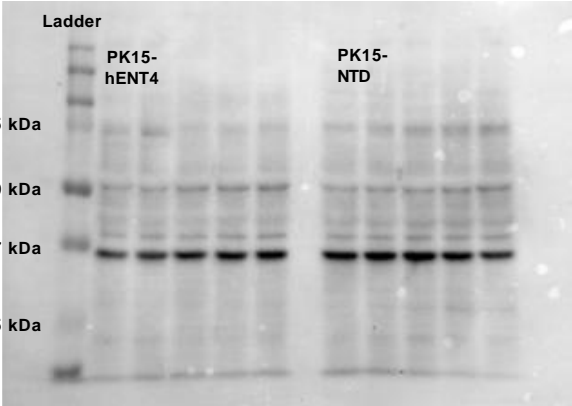

Supplement: 41598_2019_49929_MOESM1_ESM.pdf [file 41598_2019_49929_MOESM1_ESM.pdf]
